# Supplementary material for: Facile synthesis of nitrogen-doped graphene frameworks for enhanced performance of hole transport material-free perovskite solar cells
Source: Royal Society of Chemistry journal article supplement (doi:10.1039/c8tc00086g), 2018-01-01
Supplement: c8tc00086g1.pdf [file c8tc00086g1.pdf]

## Supplementary Information

### Facile Synthesis of Nitrogen-Doped Graphene Frameworks for Enhanced Performance of Hole-Transport Material-Free Perovskite Solar Cells

Yanyan Zhu<sup>ab##</sup>, Suping Jia<sup>b#</sup>, Jianfeng Zheng<sup>b</sup>, Yulong Lin<sup>a</sup>, Yarong Wu<sup>a</sup>,  
Jing Wang<sup>a\*</sup>

a. School of Pharmaceutical Sciences, Hebei Medical University. Zhongshan East Road 361, Shijiazhuang, 050017 (P.R. China); \*E-mail: jingwang@home.ipe.ac.cn; zhuyanyan@hebmh.edu.cn. Fax: +86-311-86265622; Tel: +86-311-86265627.

b. State Key Laboratory of Coal Conversion, Institute of Coal Chemistry, Chinese Academy of Sciences, Taoyuan South Road 27, Taiyuan, 030001 (P.R. China)

# These two authors contributed equally to this work.

This supplementary information containing Fig. S1-S6.

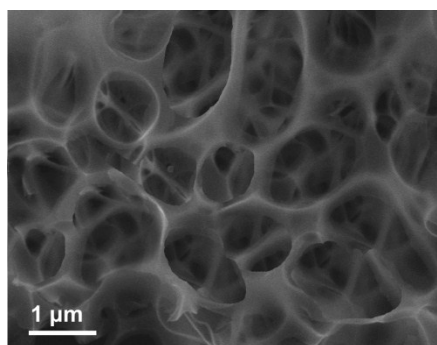

**Fig.S1** Top-view SEM image of N-GFs for TiO<sub>2</sub>/CH<sub>3</sub>NH<sub>3</sub>PbI<sub>3</sub>/N-GFs PSCs.

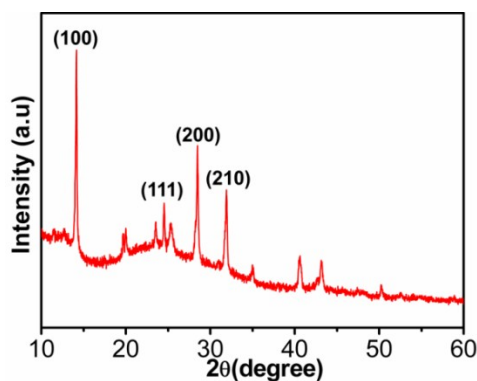

**Fig.S2** XRD spectrum of TiO<sub>2</sub>/CH<sub>3</sub>NH<sub>3</sub>PbI<sub>3</sub>/N-GFs on glass slide.

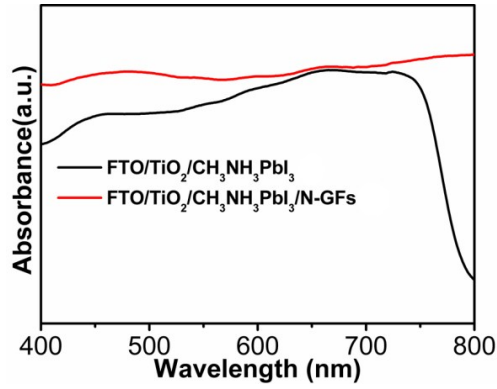

**Fig.S3** UV-Vis absorption spectra of FTO/TiO<sub>2</sub>/CH<sub>3</sub>NH<sub>3</sub>PbI<sub>3</sub> and FTO/TiO<sub>2</sub>/CH<sub>3</sub>NH<sub>3</sub>PbI<sub>3</sub>/N-GFs.

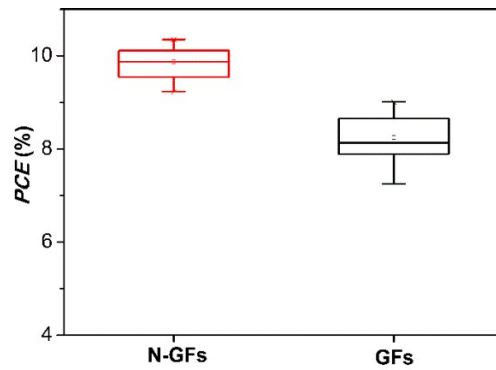

**Fig. S4** Statistics on *PCE* variations of the PSCs based on N-GFs and GFs (20 devices for each type).

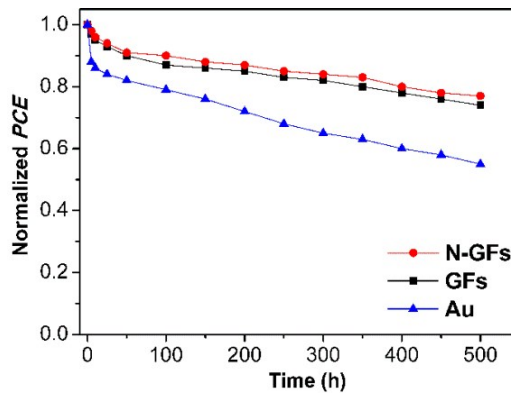

**Fig. S5** Normalized *PCE* trend of PSCs based on N-GFs, GFs and Au electrodes under AM 1.5G illumination in ambient air.

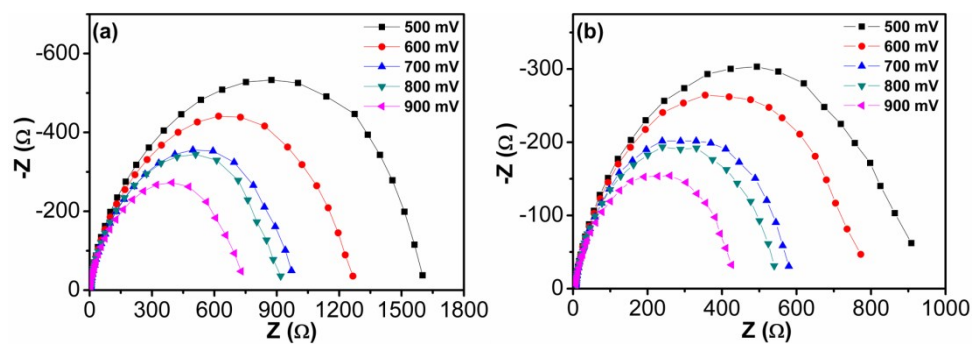

**Fig.S6** Nyquist curves of PSCs at different bias for (a) N-GFs and (b) GFs.
